# Supplementary material
Source: ML conference proceedings conference paper supplement (https://openaccess.thecvf.com/content/ICCV2023/html/Choe_Spacetime_Surface_Regularization_ICCV_2023_paper.html)
Supplement: Supplementary file 1 [file Choe_Spacetime_Surface_Regularization_ICCV_2023_supplemental.zip]

Archive with 4 entries (4 files):
- video.mp4
- __MACOSX/._video.mp4
- 05262-supp.pdf
- __MACOSX/._05262-supp.pdf
